# Supplementary material
Source: Elsevier journal article supplement (https://ora.ox.ac.uk/objects/uuid:60959f25-a845-498e-ab07-1c9eed68b33d/files/rgb19f848n:Schonenberger_et_al_2025_Supplementary_material/mmc1.pdf)
Supplement: mmc1 [file mmc1.pdf]

## Appendix

### Public availability of randomized clinical trial protocols: A repeated meta-research study

#### Table of content

|                                                                                                                                                                                                  |           |
|--------------------------------------------------------------------------------------------------------------------------------------------------------------------------------------------------|-----------|
| <b>S1) INFORMATION ON PARTICIPATING ETHIC COMMITTEES.....</b>                                                                                                                                    | <b>2</b>  |
| <b>S2) MODEL SPECIFICATION.....</b>                                                                                                                                                              | <b>2</b>  |
| <b>S3) R: SESSION INFO AND USED PACKAGES.....</b>                                                                                                                                                | <b>4</b>  |
| <b>S4) FLOW CHART OF RCT SELECTION .....</b>                                                                                                                                                     | <b>6</b>  |
| <b>S5) ADDITIONAL CHARACTERISTICS OF INCLUDED RCTS 2016.....</b>                                                                                                                                 | <b>6</b>  |
| <b>S6) BASELINE CHARACTERISTICS OF INCLUDED RCTS 2016 VS 2012.....</b>                                                                                                                           | <b>7</b>  |
| <b>S7) PROTOCOL AVAILABILITY AND SOURCES OF AVAILABLE PROTOCOLS; 2016<br/>COMPARED TO 2012 STRATIFIED BY SPONSOR.....</b>                                                                        | <b>8</b>  |
| <b>S8) LINKAGE OF AVAILABLE TRIAL PROTOCOLS TO REGISTRIES AND RESULT<br/>PUBLICATIONS.....</b>                                                                                                   | <b>9</b>  |
| <b>S9) CHARACTERISTICS ASSOCIATED WITH PROTOCOL AVAILABILITY (LOGISTIC<br/>REGRESSION); 2016 COMPARED TO 2012 .....</b>                                                                          | <b>10</b> |
| <b>S10) CHARACTERISTICS ASSOCIATED WITH PROTOCOL AVAILABILITY (LOGISTIC<br/>REGRESSION); 2012 AND 2016 COMBINED (POOLED DATA SETS) WITHOUT<br/>INTERACTION TERM.....</b>                         | <b>11</b> |
| <b>S11) CHARACTERISTICS ASSOCIATED WITH PROTOCOL AVAILABILITY (LOGISTIC<br/>REGRESSION); 2012 AND 2016 COMBINED (POOLED DATA SETS) WITH<br/>INTERACTION TERM.....</b>                            | <b>12</b> |
| <b>S12) CHARACTERISTICS ASSOCIATED WITH PROTOCOL AVAILABILITY (LOGISTIC<br/>REGRESSION); 2012 AND 2016 COMBINED (POOLED DATA SETS) WITH<br/>INTERACTION TERM AND ROBUST STANDARD ERRORS.....</b> | <b>13</b> |
| <b>S13) RELATIVE TIME RATION (RTR) EXCLUDING PROTOCOLS ONLY AVAILABLE AS<br/>SUPPLEMENTARY MATERIAL TO TRIAL RESULT PUBLICATION; STRATIFIED BY<br/>SPONSOR .....</b>                             | <b>14</b> |
| <b>REFERENCES.....</b>                                                                                                                                                                           | <b>15</b> |

## S1) Information on participating ethic committees

### Switzerland:

Basel: Ethikkommission Nordwest- und Zentralschweiz (EKNZ), Hebelstrasse 53, 4056 Basel

Bellinzona: Comitato etico cantonale, c/o Ufficio di sanità, Via Orico 5, 6501 Bellinzona

Bern: Kantonale Ethikkommission Bern, Murtenstrasse 31, 3010 Bern

Geneva: Ethics Committee Geneva, Rue Adrien-Lachenal 8, 1207 Genève

Lausanne: Ethics Committee Vaud, Avenue de Chailly 23, 1012 Lausanne

St. Gallen: Ethikkommission Ostschweiz, Oberer Graben 32, 9001 St.Gallen

Thurgau: Has joined the «Ethikkommission Ostschweiz» in 2016. See therefore details for “St. Gallen”

### United Kingdom:

Bristol office of the UK National Research Ethics Service: Health Research Authority, Temple Quay House, 2 The Square, Temple Quay, Bristol BS1 6PN

### Germany:

Freiburg: Ethik-Kommission der Albert-Ludwigs-Universität Freiburg, Engelberger Strasse 21, 79106 Freiburg

### Canada:

Hamilton: Hamilton Integrated Research Ethics Board (HiREB), 293 Wellington Street North, Suite 102, Hamilton Ontario, L8L 8E7

## S2) Model specification

**Multivariable logistic regression model, 2016**

$$\begin{aligned}\text{logit}(P(\text{protocol\_identified} = 1)) = & \beta_0 + \beta_1(\text{target\_ss\_categorized} > 500) \\ & + \beta_2(\text{target\_ss\_categorized} \in [100, 500]) \\ & + \beta_3(\text{Protocol\_Singlmult} = \text{Multi center}) \\ & + \beta_4(\text{Sponsor} = \text{Non-Industry}) \\ & + \beta_5(\text{Protocol\_Intervention\_cat} = \text{Drug})\end{aligned}$$

Where the predictors are binary for:

- Target sample size (categorized into >500, [100,500], and <100 [reference])
- RCT type (Multicenter vs. Single center [reference])
- Sponsorship (Non-Industry vs. Industry [reference])
- Type of intervention (Drug vs. No-drug [reference])

### **Multivariable logistic regression model**

$$\begin{aligned}\text{logit}(P(\text{protocol\_identified} = 1)) = & \beta_0 + \beta_1(\text{target\_ss\_categorized} > 500) \\ & + \beta_2(\text{target\_ss\_categorized} \in [100, 500]) \\ & + \beta_3(\text{Protocol\_Singlmult} = \text{Multi center}) \\ & + \beta_4(\text{Sponsor} = \text{Non-Industry}) \\ & + \beta_5(\text{Protocol\_Intervention\_cat} = \text{Drug})\end{aligned}$$

Where the predictors are binary for:

- Target sample size (categorized into >500, [100,500], and <100 [reference])
- RCT type (Multicenter vs. Single center [reference])
- Sponsorship (Non-Industry vs. Industry [reference])
- Type of intervention (Drug vs. No-drug [reference])

### **Multivariable logistic regression model, combined data sets (2016 and 2012), with interaction term**

$$\begin{aligned} \text{logit}(P(\text{protocol\_identified} = 1)) = & \beta_0 + \beta_1(\text{target\_ss\_categorized} > 500) \\ & + \beta_2(\text{target\_ss\_categorized} \in [100, 500]) \\ & + \beta_3(\text{Protocol\_Singlmult} = \text{Multi center}) \\ & + \beta_4(\text{Sponsor} = \text{Non-Industry}) \\ & + \beta_5(\text{Protocol\_Intervention\_cat} = \text{Drug}) \\ & + \beta_6(\text{year} = 2016) \\ & + \beta_7(\text{Sponsor} = \text{Non-Industry} \cap \text{year} = 2016) \end{aligned}$$

Where the predictors are binary for:

- Target sample size (categorized into >500, [100,500], and <100 [reference])
- RCT type (Multicenter vs. Single center [reference])
- Sponsorship (Non-Industry vs. Industry [reference])
- Type of intervention (Drug vs. No-drug [reference])
- Year (2016 vs. 2012 [reference])

### **Multivariable logistic regression model, combined data sets (2016 and 2012), without interaction term**

$$\begin{aligned} \text{logit}(P(\text{protocol\_identified} = 1)) = & \beta_0 + \beta_1(\text{target\_ss\_categorized} > 500) \\ & + \beta_2(\text{target\_ss\_categorized} \in [100, 500]) \\ & + \beta_3(\text{Protocol\_Singlmult} = \text{Multi center}) \\ & + \beta_4(\text{Sponsor} = \text{Non-Industry}) \\ & + \beta_5(\text{Protocol\_Intervention\_cat} = \text{Drug}) \\ & + \beta_6(\text{year} = 2016) \end{aligned}$$

Where the predictors are binary for:

- Target sample size (categorized into >500, [100,500], and <100 [reference])
- RCT type (Multicenter vs. Single center [reference])
- Sponsorship (Non-Industry vs. Industry [reference])
- Type of intervention (Drug vs. No-drug [reference])
- Year (2016 vs. 2012 [reference])

## **S3) R: Session info and used packages**

R version 4.4.1 (2024-06-14)

Platform: x86\_64-apple-darwin20  
Running under: macOS 15.3.1

|            |                                                                                                                                                                                                                                                                                                                                                                                                                                                                         |
|------------|-------------------------------------------------------------------------------------------------------------------------------------------------------------------------------------------------------------------------------------------------------------------------------------------------------------------------------------------------------------------------------------------------------------------------------------------------------------------------|
| Tidyverse  | Wickham H, Averick M, Bryan J, Chang W, McGowan LD, François R, Golemund G, Hayes A, Henry L, Hester J, Kuhn M, Pedersen TL, Miller E, Bache SM, Müller K, Ooms J, Robinson D, Seidel DP, Spinu V, Takahashi K, Vaughan D, Wilke C, Woo K, Yutani H (2019). "Welcome to the tidyverse." <i>Journal of Open Source Software</i> , *4*(43), 1686. doi: 10.21105/joss.01686 (URL: <a href="https://doi.org/10.21105/joss.01686">https://doi.org/10.21105/joss.01686</a> ). |
| knitr      | Xie Y (2024). <i>_knitr: A General-Purpose Package for Dynamic Report Generation in R_</i> . R package version 1.48, <a href="https://yihui.org/knitr/">https://yihui.org/knitr/</a>                                                                                                                                                                                                                                                                                    |
| writexl    | Ooms J (2024). <i>_writexl: Export Data Frames to Excel 'xlsx' Format_</i> . R package version 1.5.0, <a href="https://CRAN.R-project.org/package=writexl">https://CRAN.R-project.org/package=writexl</a>                                                                                                                                                                                                                                                               |
| margrittr  | Stefan Milton Bache and Hadley Wickham (2022). <i>magrittr: A Forward-Pipe Operator for R</i> . R package version 2.0.3. <a href="https://CRAN.R-project.org/package=magrittr">https://CRAN.R-project.org/package=magrittr</a>                                                                                                                                                                                                                                          |
| readxl     | Hadley Wickham and Jennifer Bryan (2023). <i>readxl: Read Excel Files</i> . R package version 1.4.3. <a href="https://CRAN.R-project.org/package=readxl">https://CRAN.R-project.org/package=readxl</a>                                                                                                                                                                                                                                                                  |
| stringr    | Wickham H (2023). <i>_stringr: Simple, Consistent Wrappers for Common String Operations_</i> . R package version 1.5.1, <a href="https://CRAN.R-project.org/package=stringr">https://CRAN.R-project.org/package=stringr</a>                                                                                                                                                                                                                                             |
| kableExtra | Zhu H (2024). <i>_kableExtra: Construct Complex Table with 'kable' and Pipe Syntax_</i> . R package version 1.4.0, <a href="https://CRAN.R-project.org/package=kableExtra">https://CRAN.R-project.org/package=kableExtra</a>                                                                                                                                                                                                                                            |
| tableone   | Kazuki Yoshida and Alexander Bartel (2022). <i>tableone: Create 'Table 1' to Describe Baseline Characteristics with or without Propensity Score Weights</i> . R package version 0.13.2. <a href="https://CRAN.R-project.org/package=tableone">https://CRAN.R-project.org/package=tableone</a>                                                                                                                                                                           |
| lubridate  | Garrett Golemund, Hadley Wickham (2011). <i>Dates and Times Made Easy with lubridate</i> . <i>Journal of Statistical Software</i> , 40(3), 1-25. URL <a href="https://www.jstatsoft.org/v40/i03/">https://www.jstatsoft.org/v40/i03/</a> .                                                                                                                                                                                                                              |
| skimr      | Elin Waring, Michael Quinn, Amelia McNamara, Eduardo Arino de la Rubia, Hao Zhu and Shannon Ellis (2022). <i>skimr: Compact and Flexible Summaries of Data</i> . R package version 2.1.5. <a href="https://CRAN.R-project.org/package=skimr">https://CRAN.R-project.org/package=skimr</a>                                                                                                                                                                               |
| officer    | Gohel D, Moog S (2024). <i>_officer: Manipulation of Microsoft Word and PowerPoint Documents_</i> . R package version 0.6.6, <a href="https://CRAN.R-project.org/package=officer">https://CRAN.R-project.org/package=officer</a>                                                                                                                                                                                                                                        |
| ggplot2    | H. Wickham. <i>ggplot2: Elegant Graphics for Data Analysis</i> . Springer-Verlag New York, 2016.                                                                                                                                                                                                                                                                                                                                                                        |
| broom      | Robinson D, Hayes A, Couch S (2024). <i>_broom: Convert Statistical Objects into Tidy Tibbles_</i> . R package version 1.0.6, <a href="https://CRAN.R-project.org/package=broom">https://CRAN.R-project.org/package=broom</a>                                                                                                                                                                                                                                           |
| pscl       | Simon Jackman (2024). <i>pscl: Classes and Methods for R Developed in the Political Science Computational Laboratory</i> . Sydney, Australia. R package version 1.5.9. URL <a href="https://github.com/atahk/pscl/">https://github.com/atahk/pscl/</a>                                                                                                                                                                                                                  |
| car        | Fox J, Weisberg S (2019). <i>_An R Companion to Applied Regression_, Third edition</i> . Sage, Thousand Oaks CA. < <a href="https://www.john-fox.ca/Companion/">https://www.john-fox.ca/Companion/</a> >.                                                                                                                                                                                                                                                               |
| lmtest     | Achim Zeileis, Torsten Hothorn (2002). <i>Diagnostic Checking in Regression Relationships</i> . <i>R News</i> 2(3), 7-10. URL <a href="https://CRAN.R-project.org/doc/Rnews/">https://CRAN.R-project.org/doc/Rnews/</a>                                                                                                                                                                                                                                                 |
| sandwich   | Zeileis A (2004). "Econometric Computing with HC and HAC Covariance Matrix Estimators." <i>Journal of Statistical Software</i> , *11*(10), 1-17. doi:10.18637/jss.v011.i10 < <a href="https://doi.org/10.18637/jss.v011.i10">https://doi.org/10.18637/jss.v011.i10</a> >.                                                                                                                                                                                               |

## S4) Flow chart of RCT selection

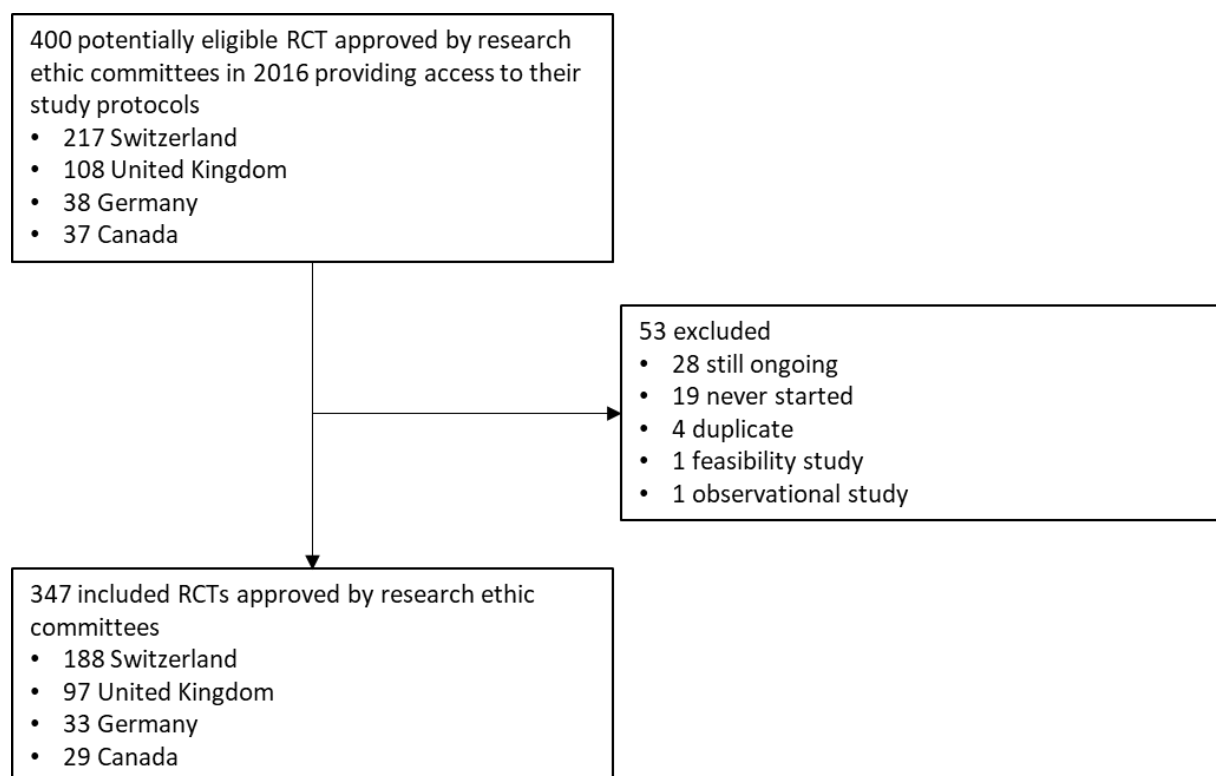

## S5) Additional characteristics of included RCTs 2016

| RCT characteristics | All included RCTs (n=347) | RCTs with publicly available protocol (n=228) | RCTs with <u>no</u> publicly available protocol (n=119) |
|---------------------|---------------------------|-----------------------------------------------|---------------------------------------------------------|
| Trial design        |                           |                                               |                                                         |
| Parallel            | 322 (92.8%)               | 217/322 (67.4%)                               | 105/322 (32.6%)                                         |
| Crossover           | 13 (3.7%)                 | 3/13 (23.1%)                                  | 10/13 (76.9%)                                           |

|                               |             |                 |                 |
|-------------------------------|-------------|-----------------|-----------------|
| Factorial                     | 5 (1.4%)    | 4/5 (80.0%)     | 1/5 (20.0%)     |
| Cluster                       | 4 (1.2%)    | 3/4 (75.0%)     | 1/4 (25.0%)     |
| Split Body                    | 3 (0.9%)    | 1/3 (33.3%)     | 2/3 (66.7%)     |
| Single center vs. multicenter |             |                 |                 |
| Single center                 | 82 (23.6%)  | 22/82 (26.8%)   | 60/82 (73.2%)   |
| Multicenter                   | 265 (76.4%) | 206/265 (77.7%) | 59/265 (22.3%)  |
| International                 | 207 (59.7%) | 170/207 (82.1%) | 37/207 (17.9%)  |
| National                      | 58 (16.7%)  | 36/58 (62.1%)   | 22/58 (37.9%)   |
| Trial registration            |             |                 |                 |
| Yes                           | 346 (99.7%) | 228/346 (65.9%) | 118/346 (34.1%) |
| No                            | 1 (0.3%)    | 0/1 (0%)        | 1/1 (100%)      |
| Status                        |             |                 |                 |
| Completed                     | 226 (65.1%) | 174/226 (77.0%) | 52/226 (24.8%)  |
| Discontinued                  | 108 (31.1%) | 52/108 (48.1%)  | 56/108 (51.9%)  |
| Unclear                       | 13 (3.7%)   | 2/13 (15.4%)    | 11/13 (84.6%)   |

## S6) Baseline characteristics of included RCTs 2016 vs 2012

|                       | 2016                      |                                               | 2012                      |                                               |
|-----------------------|---------------------------|-----------------------------------------------|---------------------------|-----------------------------------------------|
| Trial characteristics | All included RCTs (n=347) | RCTs with publicly available protocol (n=228) | All included RCTs (n=326) | RCTs with publicly available protocol (n=118) |
| Sponsorship (%)       |                           |                                               |                           |                                               |
| Industry              | 181 (52.2)                | 151/181 (83.4)                                | 179 (54.9)                | 62/179 (34.6)                                 |
| Non-Industry          | 166 (47.8)                | 77/166 (46.4)                                 | 147 (45.1)                | 56/147 (38.1)                                 |

|                                      |            |                |            |                |
|--------------------------------------|------------|----------------|------------|----------------|
| Trial design (%)                     |            |                |            |                |
| Cluster                              | 4 (1.2)    | 3/4 (75.0)     | 4 (1.2)    | 3/4 (75.0)     |
| Crossover                            | 13 (3.7)   | 3/13 (23.1)    | 0/0 (0)    | 0/0 (0)        |
| Factorial                            | 5 (1.4)    | 4/5 (80.0)     | 10 (3.1)   | 6/10 (60.0)    |
| Parallel                             | 322 (92.8) | 217/322 (67.4) | 296 (90.8) | 109/296 (36.8) |
| Split Body                           | 3 (0.9)    | 1/3 (33.4)     | 0/0 (0)    | 0/0 (0)        |
| Drug vs. non-drug intervention       |            |                |            |                |
| Drug                                 | 212 (61.1) | 163/212 (76.8) | 207 (63.5) | 77/207 (37.2)  |
| Non-Drug                             | 135 (38.9) | 65/135 (48.1)  | 119 (36.5) | 41/119 (34.5)  |
| Single center vs. multicenter        |            |                |            |                |
| Single center                        | 82 (23.6)  | 22/82 (26.8)   | 60 (18.4)  | 12/60 (20.0)   |
| Multicenter                          | 265 (76.4) | 206/265 (77.7) | 266 (81.6) | 106/266 (39.8) |
| RCT result publication available (%) |            |                |            |                |
| Yes                                  | 248 (71.5) | 189/248 (76.2) | 256 (78.5) | 110/256 (43.0) |
| Number of participants               |            |                |            |                |
| <100                                 | 79 (22.8)  | 29/79 (36.7)   | 73 (22.4)  | 14/73 (19.2)   |
| 100-500                              | 191 (55.0) | 131/191 (68.6) | 151 (46.3) | 45/151 (29.8)  |
| >500                                 | 77 (22.2)  | 68/77 (88.3)   | 102 (31.3) | 59/102 (57.8)  |
| Country of ethical approval (%)      |            |                |            |                |
| Canada                               | 29 (8.4)   | 22/29 (75.9)   | 35 (10.7)  | 20/35 (57.1)   |
| Germany                              | 33 (9.5)   | 24/33 (72.7)   | 37 (11.3)  | 9/37 (24.3)    |
| Switzerland                          | 188 (54.2) | 109/188 (58.0) | 165 (50.6) | 54/165 (32.7)  |
| UK                                   | 97 (28.0)  | 73/97 (75.3)   | 89 (27.3)  | 35/89 (39.3)   |

## S7) Protocol availability and sources of available protocols; 2016 compared to 2012 stratified by sponsor

| Protocol availability      | 2016             |                      |                 | 2012             |                      |                 |
|----------------------------|------------------|----------------------|-----------------|------------------|----------------------|-----------------|
| Sponsorship                | Industry (n=181) | Non-Industry (n=166) | Overall (n=347) | Industry (n=179) | Non-Industry (n=147) | Overall (n=326) |
| No protocol Identified (%) | 30/181 (16.6%)   | 89/166 (53.6%)       | 119/347 (34.3)  | 117/179 (65.4%)  | 91/147 (61.9%)       | 208/326 (63.8)  |
| Protocol identified (%)    | 151/181 (83.4%)  | 77/166 (46.4%)       | 228/347 (65.7)  | 62/179 (36.8%)   | 56/147 (38.1%)       | 118/326 (36.2)  |



|                                                   |                    |                   |                                 |                   |                   |                               |
|---------------------------------------------------|--------------------|-------------------|---------------------------------|-------------------|-------------------|-------------------------------|
| As a file on a clinical trial registry            | 135/181<br>(74.6%) | 15/166<br>(9.0%)  | 150/347 <sup>1</sup><br>(43.2%) | 11/179<br>(6.1%)  | 2/147<br>(1.4%)   | 13/326<br>(4.0%) <sup>2</sup> |
| As a supplementary file to the result publication | 61/181<br>(33.7%)  | 30/166<br>(18.1%) | 91/347<br>(26.2%)               | 37/179<br>(20.7%) | 11/147<br>(7.5%)  | 48/326<br>(14.7%)             |
| Peer-reviewed publication                         | 31/181<br>(17.1%)  | 50/166<br>(30.1%) | 81/347<br>(23.3%)               | 13/179<br>(7.3%)  | 43/147<br>(29.3%) | 56/326<br>(17.2%)             |
| As a file on the trial website                    | 5/181<br>(2.8%)    | 4/166<br>(2.4%)   | 9/347<br>(2.6%)                 | 2/179<br>(1.1%)   | 0/147             | 2/326<br>(0.6%)               |
| As a PDF file on google scholar                   | 0/181              | 2/166<br>(1.2%)   | 2/347<br>(0.6%)                 | 0/179             | 0/147             | 1/326<br>(0.3%)               |
| Other                                             | 0/181              | 4/166<br>(1.2%)   | 4/347 <sup>3</sup><br>(1.2%)    | 0/179             | 0/147             | 0/326 <sup>4</sup>            |

<sup>1</sup> clinicaltrials.gov (n=146), ISRCTN registry (n=2), DRKS registry (n=1), ANZCTR registry (n=1)

<sup>2</sup> clinicaltrials.gov (n=12), DRKS registry (n=1)

<sup>3</sup>Other 2016: PDF on Google (n=1), Study protocol for the pilot RCT (n=1), pre-print (n=1)

<sup>4</sup>Other 2012: DRKS registry (n=1)

## S8) Linkage of available trial protocols to registries and result publications

| <b>Trial characteristics</b>                         | <b>RCTs with publicly available protocol 2016 (n=228)</b> | <b>RCT with publicly available protocol 2012 (n=118)</b> |
|------------------------------------------------------|-----------------------------------------------------------|----------------------------------------------------------|
| Protocol linked to trial registry                    |                                                           |                                                          |
| No                                                   | 32/228 (14.0%)                                            | 52/118 (44.1%)                                           |
| Yes                                                  | 196/228 (86.0%)                                           | 66/118 (55.9%)                                           |
| Protocol linked to RCT result publication            |                                                           |                                                          |
| No                                                   | 43/228 (18.9%)                                            | 10/118 (8.5%)                                            |
| Not applicable since no result publication available | 45/228 (19.7%)                                            | 8/118 (6.8%)                                             |
| Yes                                                  | 140/228 (61.4%)                                           | 100/118 (84.7%)                                          |

## S9) Characteristics associated with protocol availability (logistic regression); 2016 compared to 2012

| <b>2016</b>            |  |                     |           |               |                |           |               |                |
|------------------------|--|---------------------|-----------|---------------|----------------|-----------|---------------|----------------|
| <b>Characteristics</b> |  | <b>Protocol not</b> | <b>OR</b> | <b>95% CI</b> | <b>P value</b> | <b>OR</b> | <b>95% CI</b> | <b>P value</b> |

|                                 | Protocol available (n=228) | available (n=119)              | Univariable |             |         | Multivariable |            |         |
|---------------------------------|----------------------------|--------------------------------|-------------|-------------|---------|---------------|------------|---------|
| Sample size <100                | 29 (12.7%)                 | 50 (42.0%)                     | Reference   |             |         |               |            |         |
| Sample size 100-500             | 131 (57.5%)                | 60 (50.4%)                     | 3.76        | 2.17-6.53   | <0.001  | 2.36          | 1.25-4.43  | 0.008   |
| Sample size >500                | 68 (29.8%)                 | 9 (7.6%)                       | 13.03       | 5.67-29.94  | <0.001  | 6.00          | 2.39-15.06 | <0.001  |
| Multicenter (vs. single center) | 206 (90.4%)                | 59 (49.6%)                     | 9.52        | 5.40-16.80  | <0.001  | 3.17          | 1.61-6.24  | 0.001   |
| Non-industry (vs. industry)     | 77 (33.8%)                 | 89 (74.8%)                     | 0.17        | 0.11-0.28   | <0.001  | 0.37          | 0.20-0.68  | 0.002   |
| Drug (vs. non-drug)             | 163 (71.5)                 | 49 (41.2)                      | 3.58        | 2.251-5.702 | <0.001  | 1.447         | 0.81-2.60  | 0.216   |
| 2012                            |                            |                                |             |             |         |               |            |         |
| Characteristics                 | Protocol available (n=118) | Protocol not available (n=208) | OR          | 95% CI      | P value | OR            | 95% CI     | P value |
|                                 |                            |                                | Univariable |             |         | Multivariable |            |         |
| Sample size <100                | 14 (11.9%)                 | 59 (28.4%)                     | Reference   |             |         |               |            |         |
| Sample size 100-500             | 45 (38.1%)                 | 106 (51.0%)                    | 1.79        | 0.93-3.63   | 0.093   | 1.83          | 0.91-3.83  | 0.09    |
| Sample size >500                | 59 (50%)                   | 43 (20.7%)                     | 5.78        | 2.93-12.02  | <0.001  | 5.90          | 2.75-13.31 | <0.001  |
| Multicenter (vs. single center) | 106 (89.8%)                | 160 (76.9%)                    | 2.65        | 1.38-5.44   | 0.005   | 2.01          | 0.92-4.62  | 0.087   |
| Non-industry (vs. industry)     | 56 (47.5%)                 | 91 (43.8%)                     | 1.16        | 0.74-1.83   | 0.518   | 1.99          | 1.11-3.59  | 0.021   |
| Drug (vs. non-drug)             | 77 (65.3%)                 | 130 (62.5%)                    | 1.13        | 0.71-1.81   | 0.619   | 0.92          | 0.51-1.68  | 0.788   |

**S10) Characteristics associated with protocol availability (logistic regression); 2012 and 2016 combined (pooled data sets) without interaction term**

| Characteristics     | Protocol available (n=346) | Protocol not available (n=327) | OR        | 95% CI    | P value |
|---------------------|----------------------------|--------------------------------|-----------|-----------|---------|
| Univariable         |                            |                                |           |           |         |
| Sample size <100    | 14 (4.0%)                  | 29 (8.9%)                      | Reference |           |         |
| Sample size 100-500 | 176 (50.9%)                | 166 (50.8%)                    | 2.69      | 1.78-4.06 | <0.001  |
| Sample size >500    | 127 (36.7%)                | 52 (15.9%)                     | 6.19      | 3.84-9.99 | <0.001  |

| Characteristics                         | Protocol available (n=346) | Protocol not available (n=327) | OR        | 95% CI    | P value |
|-----------------------------------------|----------------------------|--------------------------------|-----------|-----------|---------|
| Multicenter (vs. single center)         | 312 (90.2)                 | 219 (67.0%)                    | 4.53      | 2.97-6.90 | <0.001  |
| Non-industry (vs. industry)             | 133 (38.4%)                | 180 (55.0%)                    | 0.51      | 0.38-0.69 | <0.001  |
| Drug (vs. non-drug)                     | 240 (69.4%)                | 179 (54.7%)                    | 1.87      | 1.37-2.57 | <0.001  |
| 2016 (vs. 2012)                         | 228 (65.9%)                | 119 (36.4%)                    | 3.38      | 2.46-4.64 | <0.001  |
| Multivariable                           |                            |                                |           |           |         |
| Sample size <100                        | 14 (4.01%)                 | 29 (8.9%)                      | Reference |           |         |
| Sample size 100-500 (multi)             | 176 (50.9%)                | 166 (50.8%)                    | 1.97      | 1.23-3.13 | 0.005   |
| Sample size >500 (multi)                | 127 (36.7%)                | 52 (15.9%)                     | 5.08      | 2.90-8.90 | <0.001  |
| Multicenter (vs. single center) (multi) | 312 (90.2%)                | 219 (67.0%)                    | 3.41      | 1.99-5.84 | <0.001  |
| Non-industry (vs. industry)             | 133 (38.4)                 | 180 (55.0%)                    | 0.92      | 0.61-1.40 | 0.696   |
| Drug (vs. non-drug) (multi)             | 240 (69.4)                 | 179 (54.7%)                    | 1.14      | 0.75-1.72 | 0.543   |
| 2016 (vs. 2012) (multi)                 | 228 (65.9)                 | 119 (36.4%)                    | 5.03      | 3.49-7.27 | <0.001  |

## S11) Characteristics associated with protocol availability (logistic regression); 2012 and 2016 combined (pooled data sets) with interaction term

The significant interaction term indicates dependence of sponsorship and year. If the year is fixed to 2012, non-industry sponsored trials have higher odds for protocol availability (OR: 2.38; 95% CI 1.39-4.11; p=0.001) similar to trials approved in 2016 when sponsorship is fixed to industry (OR: 13.47; 95% CI 7.96-23.50; p<0.001).

| Characteristics             | Protocol available (n=346) | Protocol not available (n=327) | OR        | 95% CI    | P value |
|-----------------------------|----------------------------|--------------------------------|-----------|-----------|---------|
| Sample size <100            | 14 (4.01%)                 | 29 (8.9%)                      | Reference |           |         |
| Sample size 100-500 (multi) | 176 (50.9%)                | 166 (50.8%)                    | 2.12      | 1.32-3.43 | 0.001   |

| Characteristics                          | Protocol available (n=346) | Protocol not available (n=327) | OR    | 95% CI     | P value |
|------------------------------------------|----------------------------|--------------------------------|-------|------------|---------|
| Sample size >500 (multi)                 | 127 (36.7%)                | 52 (15.9%)                     | 6.12  | 3.45-11.07 | <0.001  |
| Multicenter (vs. single center) (multi)  | 312 (90.2%)                | 219 (67.0%)                    | 2.66  | 1.59-4.52  | <0.001  |
| Drug (vs. non-drug) (multi)              | 240 (69.4)                 | 179 (54.7%)                    | 1.15  | 0.75-1.74  | 0.520   |
| Non-industry (vs. industry) <sup>1</sup> | 133 (38.4)                 | 180 (55.0%)                    | 2.38  | 1.39-4.11  | 0.001   |
| 2016 (vs. 2012) (multi) <sup>2</sup>     | 228 (65.9)                 | 119 (36.4%)                    | 13.47 | 7.96-23.50 | <0.001  |
| Non-Industry*2016 <sup>3</sup>           |                            |                                | 0.13  | 0.06-0.27  | <0.001  |

<sup>1</sup> Fixed on year=2012

<sup>2</sup> Fixed on sponsorship=industry

<sup>3</sup> Interaction term to account for interaction of year of RCT approval and sponsorship.

## S12) Characteristics associated with protocol availability (logistic regression); 2012 and 2016 combined (pooled data sets) with interaction term and robust standard errors

Sensitivity analysis to assess factors associated with making trial RCT protocols available using conservative cluster-robust standard errors with covariance matrix estimation HC3 bias adjustment to account for potential country-level correlation in the data.<sup>1</sup>

| Characteristics             | Protocol available (n=346) | Protocol not available (n=327) | OR        | 95% CI      | P value |
|-----------------------------|----------------------------|--------------------------------|-----------|-------------|---------|
| Sample size <100            | 14 (4.01%)                 | 29 (8.9%)                      | Reference |             |         |
| Sample size 100-500 (multi) | 176 (50.9%)                | 166 (50.8%)                    | 2.12      | 1.56- 2.88  | <0.001  |
| Sample size >500 (multi)    | 127 (36.7%)                | 52 (15.9%)                     | 6.12      | 3.37- 11.13 | <0.001  |

| Characteristics                          | Protocol available (n=346) | Protocol not available (n=327) | OR    | 95% CI     | P value |
|------------------------------------------|----------------------------|--------------------------------|-------|------------|---------|
| Multicenter (vs. single center) (multi)  | 312 (90.2%)                | 219 (67.0%)                    | 2.66  | 1.22-5.79  | 0.014   |
| Drug (vs. non-drug) (multi)              | 240 (69.4)                 | 179 (54.7%)                    | 1.15  | 0.75-1.75  | 0.523   |
| Non-industry (vs. industry) <sup>1</sup> | 133 (38.4)                 | 180 (55.0%)                    | 2.38  | 0.62-9.05  | 0.204   |
| 2016 (vs. 2012) (multi) <sup>2</sup>     | 228 (65.9)                 | 119 (36.4%)                    | 13.47 | 8.28-21.93 | <0.001  |
| Non-Industry*2016 <sup>3</sup>           |                            |                                | 0.13  | 0.06-0.30  | <0.001  |

<sup>1</sup> Fixed on year=2012

<sup>2</sup> Fixed on sponsorship=industry

<sup>3</sup> Interaction term to account for interaction of year of RCT approval and sponsorship.

## S13) Relative Time Ration (RTR) excluding protocols only available as supplementary material to trial result publication; stratified by sponsor

Relative time of protocol availability, stratified by sponsor

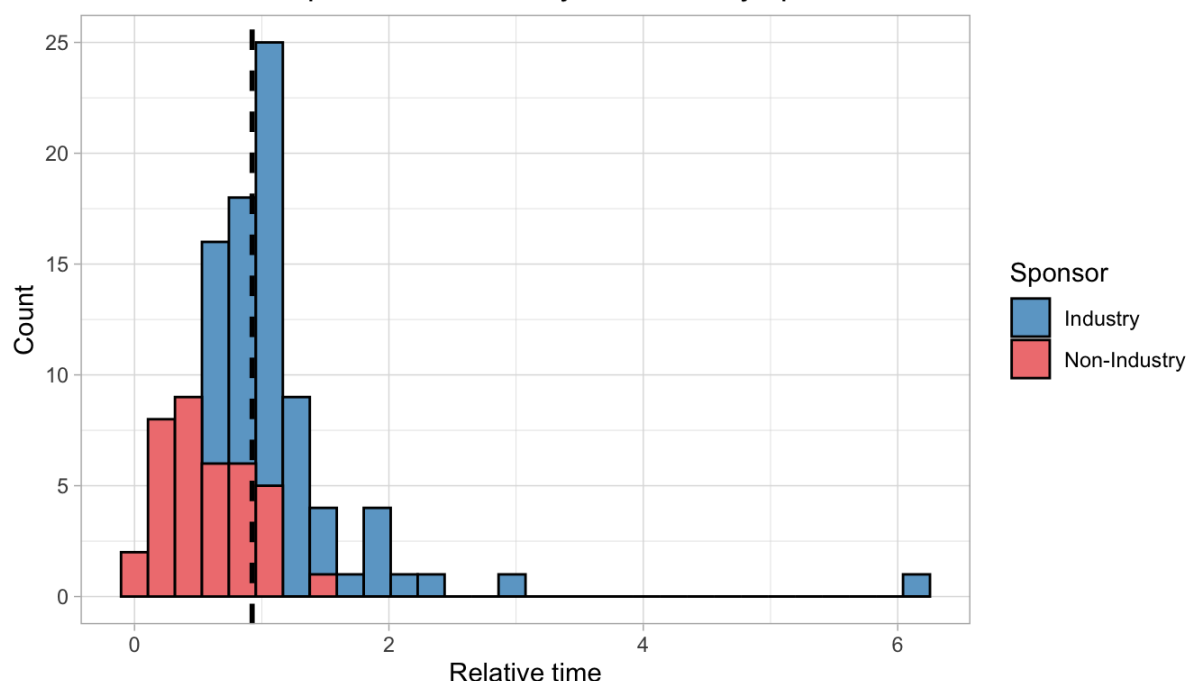

Note:

\*relative time = days to protocol availability from start of trial/ days to publication from start of trial

0 = start of trial

1 = publication of trial results

--- median relative time

## References

1. Zeileis A. Econometric Computing with HC and HAC Covariance Matrix Estimators. *Journal of Statistical Software* 2004;11(10):1 - 17. DOI: 10.18637/jss.v011.i10.
